# Supplementary material for: Sex Differences in Effects of Mood, Eating-Related Behaviors, and BMI on Food Appeal and Desire to Eat: A Cross-Sectional Survey Study
Source: MDPI journal article supplement (doi:10.3390/nu15030762), 2023-02-02
Supplement: s1 [file s1]

# Sex Differences in Effects of Mood, Eating-Related Behaviors, and BMI on Food Appeal and Desire to Eat: A Cross-Sectional Survey Study

Kristina T. Legget <sup>1,2\*</sup>, Marc-Andre Cornier <sup>3</sup>, Lauren Sarabia <sup>1</sup>, Eve M. Delao <sup>1</sup>, Susan K. Mikulich-Gilbertson <sup>1</sup>, Crystal Natvig <sup>1</sup>, Christina Erpelding <sup>1</sup>, Tessa Mitchell <sup>1</sup>, Allison Hild <sup>1</sup>, Eugene Kronberg <sup>1</sup> and Jason R. Tregellas <sup>1,2</sup>

*Supplementary Materials*

## Study Instructions

To complete this study, we require that participants are in a neutral state of hunger. That means that you have not eaten anything within the last 2 hours but that it hasn't been more than 3 hours since you last ate something. This applies to both meals and snacks. For example, if you had breakfast at 8:00 AM, you could begin the study any time between 10:00 and 11:00 AM. If you had a mid-day snack at 2:00 PM, then you would start the study any time between 4:00 and 5:00 PM. If you have not eaten within the time window described above, please hit the "Save and Return Later" button. You will be provided with a unique code to return to the survey; please write down this code and/or keep the tab open until you are eligible to participate. Thank you for complying with study procedures.

Please use Google Chrome to complete this study.

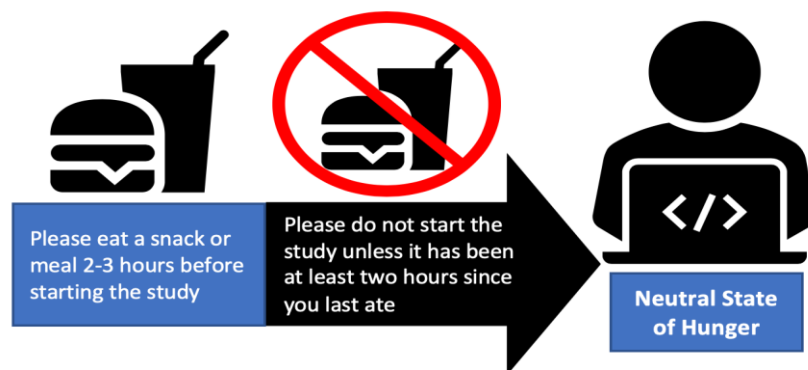

(If this is not true for you, please return to complete the study after it has been 2-3 hours since you have last eaten.)

☐ By clicking this button, you are stating that you have eaten within the time window described above and are eligible to participate at this time.

**Supplementary Figure S1.** Infographic presented at the start of the online survey to help convey the hunger state in which participants should complete the study.

**Supplementary Table S1.** Descriptions, caloric content (kcal per 100g), and image set (high-calorie (HC) or low-calorie (LC)) for the images in the food pictures task.

| Description                                     | Kcal<br>(per 100g) | HC or LC Image<br>Set |
|-------------------------------------------------|--------------------|-----------------------|
| Ice cream sundae                                | 279                | HC                    |
| Nachos with ground beef, avocado, tomato        | 305                | HC                    |
| “Digiorno Rising Crust” pepperoni pizza         | 282                | HC                    |
| Pancakes with syrup                             | 300                | HC                    |
| Flourless chocolate cake with raspberries       | 379                | HC                    |
| “Milky Way” candy bar                           | 456                | HC                    |
| “Fruit Loops” cereal with milk                  | 163                | HC                    |
| Banana split                                    | 196                | HC                    |
| Oatmeal raisin cookies                          | 450                | HC                    |
| Enchiladas                                      | 142                | HC                    |
| Fettuccine alfredo                              | 387                | HC                    |
| Chocolate milkshake                             | 217                | HC                    |
| Bacon                                           | 468                | HC                    |
| Blueberry cheesecake                            | 295                | HC                    |
| Tater tots with ketchup                         | 183                | HC                    |
| Waffles with bacon and maple syrup              | 378                | HC                    |
| “Carl’s Jr Western Bacon Cheeseburger”          | 315                | HC                    |
| Cream-filled cannoli with chocolate chips       | 471                | HC                    |
| Curly fries                                     | 176                | HC                    |
| Cheese pesto pizza                              | 273                | HC                    |
| Checkerboard cake with chocolate frosting       | 374                | HC                    |
| McDonald’s french fries                         | 312                | HC                    |
| Chocolate cake with frosting and cocoa powder   | 362                | HC                    |
| Spaghetti with meatballs                        | 143                | HC                    |
| Frito pie casserole                             | 414                | HC                    |
| Baked potato with cheese, bacon, and sour cream | 149                | HC                    |
| “Drumsticks Lil’ Drums” ice cream cone          | 354                | HC                    |
| Key lime pie                                    | 468                | HC                    |
| Assorted chocolates                             | 441                | HC                    |
| Double chocolate cake                           | 399                | HC                    |
| Waffle with ice cream and chocolate sauce       | 331                | HC                    |
| Meat lasagna with garlic bread                  | 202                | HC                    |
| Potatoes au gratin                              | 357                | HC                    |
| Grilled cheese sandwich                         | 364                | HC                    |
| Pineapple upside-down cake                      | 328                | HC                    |
| Onion rings and “Outback Bloomin’ Onion Sauce”  | 354                | HC                    |
| Raised donuts with icing                        | 421                | HC                    |
| Vanilla cupcakes with frosting                  | 382                | HC                    |
| Cinnamon roll                                   | 452                | HC                    |
| Meat lasagna                                    | 188                | HC                    |
| Quesadilla with shredded pork, onions, peppers  | 290                | HC                    |
| Red velvet cake with frosting                   | 449                | HC                    |
| Fish and chips with tartar sauce                | 269                | HC                    |

|                                                                          |     |    |
|--------------------------------------------------------------------------|-----|----|
| Peach cobbler with vanilla ice cream                                     | 204 | HC |
| Cheeseburger                                                             | 286 | HC |
| Ice cream brownie sundae                                                 | 345 | HC |
| Potato chips with ridges                                                 | 532 | HC |
| Flatbread with cheese                                                    | 262 | HC |
| Chicken noodle soup                                                      | 61  | LC |
| Fruit platter (pineapple, grapes, strawberries, kiwi, melon)             | 47  | LC |
| Orange slices                                                            | 47  | LC |
| Hard boiled eggs                                                         | 143 | LC |
| Peaches                                                                  | 42  | LC |
| Watermelon (sliced)                                                      | 30  | LC |
| Grilled chicken with zucchini and squash                                 | 125 | LC |
| Mixed berries (strawberries, raspberries, blackberries, blueberries)     | 46  | LC |
| Green beans                                                              | 58  | LC |
| Omelet with mushrooms, broccolini, spinach, onions                       | 92  | LC |
| Fruit skewers (strawberry, orange, pineapple, kiwi, blueberry, grape)    | 54  | LC |
| Kiwi                                                                     | 58  | LC |
| Blackberries                                                             | 43  | LC |
| Strawberries                                                             | 32  | LC |
| Green apple slices                                                       | 52  | LC |
| Grilled zucchini                                                         | 91  | LC |
| Mixed fruit (melon, kiwi, grapefruit)                                    | 45  | LC |
| Celery sticks (raw)                                                      | 14  | LC |
| Greek salad: cucumber, tomatoes, feta cheese, kalamata olives, red onion | 91  | LC |
| Sweet peas with butter                                                   | 102 | LC |
| Scrambled eggs with spinach and radishes                                 | 133 | LC |
| Cauliflower (cooked)                                                     | 52  | LC |
| Pomegranate                                                              | 83  | LC |
| Beets (cooked) with Italian dressing                                     | 72  | LC |
| Celery and carrot sticks (raw)                                           | 27  | LC |
| Mixed greens with tomatoes                                               | 17  | LC |
| Mixed vegetables: asparagus, tomatoes, zucchini, corn                    | 35  | LC |
| Green apple (halved)                                                     | 52  | LC |
| Mixed fruit (strawberries, kiwi, pineapple, cantaloupe, blueberries)     | 45  | LC |
| Roasted carrots                                                          | 68  | LC |
| Sweet corn (kernels, cooked)                                             | 87  | LC |
| Beef broth with tofu, mushrooms, celery                                  | 26  | LC |
| Grilled chicken with asparagus                                           | 119 | LC |
| Grapes                                                                   | 69  | LC |
| Brussels sprouts (raw)                                                   | 45  | LC |
| Mixed greens with onions, bell pepper, asparagus, cucumber               | 20  | LC |
| Starfruit                                                                | 31  | LC |
| Melon balls (watermelon, cantaloupe, honeydew)                           | 33  | LC |
| Chicken broth                                                            | 6   | LC |
| Raspberries                                                              | 52  | LC |
| Cherries                                                                 | 63  | LC |
| Tilapia with collard greens and red potatoes                             | 95  | LC |

---

|                                    |    |    |
|------------------------------------|----|----|
| Bananas (whole)                    | 89 | LC |
| Blueberries                        | 57 | LC |
| Roasted zucchini and yellow squash | 51 | LC |
| Green grapes (on vine)             | 69 | LC |
| Red pear                           | 57 | LC |
| Cucumber (raw)                     | 15 | LC |

---

HC: high-calorie; LC: low-calorie.
